# Supplementary material for: The Contribution of Home, Neighbourhood and School Environmental Factors in Explaining Physical Activity among Adolescents
Source: Hindawi journal article supplement (doi:10.1155/2009/320372), 2009-01-01
Supplement: f1 [file 320372.f1.pdf]

## Appendix 1 (selection of questions) based on the FPAQ (Philippaerts et al., 2006)

By answering the following questions, face a 'usual' week (7 days)

1. **How do you usually go to school and back home?** (indicate the right answer, you can indicate several possibilities)

**O cycling**

How long do you cycle from home to school per day  
..... minutes

**O walking**

How long do you walk from home to school per day..... minutes

**O by car, train, bus or motorcycle**

How long does it take to travel from home to school per day  
..... minutes

**O by step or rollerblades**

How long does it take to travel from home to school per day  
..... minutes

2. **How much time is weekly provided for PE?** ..... minutes per week

3. **In which activities do you participate?**

(indicate the right answer, you can indicate several possibilities)

- O** sports or physical activities during lunch break and playtime
- O** sports or physical activities after school hours
- O** sports or physical activities on Wednesday afternoon
- O** sports or physical activities on class- or school tournaments

4. **How much time do you spend on all these activities?** (indicate the right answer)

- |                            |                                     |
|----------------------------|-------------------------------------|
| <b>O</b> now and then      | <b>O</b> 2 hours per week           |
| <b>O</b> 1 hour per month  | <b>O</b> 3 hours per week           |
| <b>O</b> 2 hours per month | <b>O</b> 4 hours per week           |
| <b>O</b> 3 hours per month | <b>O</b> more than 4 hours per week |
| <b>O</b> 1 hour per week   |                                     |

5. **How much time per day do you use walking for transportation in leisure time during a regular weekday?** (the same repeated for cycling)

- |                        |                          |
|------------------------|--------------------------|
| <b>O</b> 0-10 minutes  | <b>O</b> 50-60 minutes   |
| <b>O</b> 10-20 minutes | <b>O</b> 1h-1h10 minutes |
| <b>O</b> 20-30 minutes | <b>O</b> > 1h10 minutes  |
| <b>O</b> 30-40 minutes |                          |
| <b>O</b> 40-50 minutes |                          |

6. **How much time per day do you use walking for transportation in leisure time during a regular weekendday?** (the same repeated for cycling)

- |                        |                          |
|------------------------|--------------------------|
| <b>O</b> 0-10 minutes  | <b>O</b> 50-60 minutes   |
| <b>O</b> 10-20 minutes | <b>O</b> 1h-1h10 minutes |
| <b>O</b> 20-30 minutes | <b>O</b> > 1h10 minutes  |
| <b>O</b> 30-40 minutes |                          |
| <b>O</b> 40-50 minutes |                          |

**7. Give the three main sports you practiced most in leisure time.**

(note: physical education and school sports do not count for your sports in leisure time)

**My first sport**

(the same for my second and third sport)

☐ I don't practice a sport in leisure time

☐ My first sport is: .....

| <u>How often</u> do you practice this sport?<br>(indicate only 1 option) | <u>How much time (hours)</u> do you spend<br>on this sport? |
|--------------------------------------------------------------------------|-------------------------------------------------------------|
| <input type="radio"/> now and then                                       | ..... hours per year                                        |
| <input type="radio"/> one week per year                                  |                                                             |
| <input type="radio"/> two weeks per year                                 |                                                             |
| <input type="radio"/> three weeks per year                               |                                                             |
| <input type="radio"/> four weeks per year                                |                                                             |
| <input type="radio"/> one time per month                                 | ..... hours per month                                       |
| <input type="radio"/> two times per month                                |                                                             |
| <input type="radio"/> three times per month                              |                                                             |
| <input type="radio"/> one time per week                                  | ..... hours per week                                        |
| <input type="radio"/> two times per week                                 |                                                             |
| <input type="radio"/> three times per week                               |                                                             |
| <input type="radio"/> four times per week                                |                                                             |
| <input type="radio"/> five times per week                                |                                                             |
| <input type="radio"/> six times per week                                 |                                                             |
| <input type="radio"/> seven times per week                               |                                                             |
| <input type="radio"/> more than seven times per week                     |                                                             |

Do you participate in organized training?

☐ yes

☐ no

Do you participate in organized competition?

☐ yes

☐ no

**Thank you very much for your cooperation!!**
